# Supplementary material
Source: PubMed Central journal article supplement (PMC3507145)
Supplement: supp_blood-2012-07-441311_blood-2012-07-441311-1.pdf [file supp_blood-2012-07-441311_blood-2012-07-441311-1.pdf]

## The signal transducers STAT5 and STAT3 control expression of Id2 and E2-2 during dendritic cell development

Haiyan S. Li, Cliff Y. Yang, Kalyan Nallaparaju, Huiyuan Zhang, Yong-Jun Liu, Ananda W. Goldrath and Stephanie S. Watowich

### Supplementary information

#### Figure S1. Sorting strategy for CDPs, pDCs, spleen and liver DC subsets.

CDPs ( $\text{lin}^- \text{CD117}^{\text{lo}} \text{CD115}^+ \text{Flt3}^+$ ) and pDCs ( $\text{CD11c}^+ \text{CD11b}^- \text{B220}^+ \text{PDCA-1}^+$ ) were sorted from BM cells following MACS-mediated depletion of lineage marker- (Gr1, CD11b, CD3, CD19, F4/80 and Ter-119) positive cells, using the indicated strategy.  $\text{CD8}\alpha^+$  ( $\text{CD11c}^+ \text{B220}^- \text{CD4}^- \text{CD8}\alpha^+$ ),  $\text{CD4}^+$  ( $\text{CD11c}^+ \text{B220}^- \text{CD4}^+ \text{CD8}\alpha^-$ ), and  $\text{CD4}^- \text{CD8}\alpha^-$  ( $\text{CD11c}^+ \text{B220}^- \text{CD4}^- \text{CD8}\alpha^-$ ) DCs were isolated from splenocytes following MACS-mediated depletion of lineage marker- (Gr1, CD3, CD19, F4/80 and Ter-119) positive cells.  $\text{CD103}^+$  ( $\text{CD11c}^+ \text{B220}^- \text{CD103}^+ \text{MHCII}^+$ ) DCs were isolated from 37%/70% Percoll-enriched liver mononuclear cells following collagenase digestion.

#### Figure S2. Characterization of hematopoietic-*Stat5*<sup>Δ/Δ</sup> mice.

(A) Bone marrow cells were isolated from hematopoietic-*Stat5*<sup>Δ/Δ</sup> and *Stat5*<sup>+/+</sup> mice. Whole cell lysates were analyzed by immunoblotting, using antibodies specific for total STAT5 or tubulin. Results from 2 independent animals of each genotype are shown. (B) Hematologic parameters and WBC differential counts of hematopoietic-*Stat5*<sup>Δ/Δ</sup> and *Stat5*<sup>+/+</sup> mice, determined by automated counting.

#### Figure S3. Analysis of LN CD103<sup>+</sup> DCs.

Peripheral (LN) and mesenteric (mLN) lymph nodes were isolated from hematopoietic-*Stat5*<sup>Δ/Δ</sup> and *Stat5*<sup>+/+</sup> mice. Single cell suspensions were stained with antibodies for DC surface markers and analyzed by flow cytometry. MHC II and CD103 expression was

analyzed within the CD11c<sup>+</sup> B220<sup>-</sup> population, and is shown as a percentage of total LN cells. Data are representative of 2 mice per group.

**Figure S4. Characterization of DC marker expression.**

(A) Hematopoietic-*Stat5*<sup>Δ/Δ</sup> and *Stat5*<sup>+/+</sup> mice were treated by HGT with GM-CSF plasmid or empty pORF vector, as indicated. At d 7, liver mononuclear cells were enriched as described in Figure S1, and CD103 expression was analyzed within the CD11c<sup>-</sup> or CD11c<sup>+</sup> B220<sup>-</sup> populations, by flow cytometry, as shown. Data represent 2-6 mice/group. (B) Surface expression of CD24 and CD11b on CD103<sup>+</sup> DCs isolated from mice treated by HGT with GM-CSF plasmid or empty pORF vector, as indicated. CD103<sup>+</sup> DCs were defined as shown in Figure S1. (C) Liver CD103<sup>+</sup> DCs were purified by FACS as described in Figure S1 and treated with GM-CSF ex vivo. Cells were collected at d 0, d 1 and d 2, as indicated, and analyzed for CD11b expression. Data are representative of 3 independent experiments.

**Figure S5. Analysis of the murine *Id2* and *Tcf4* promoter regions.** The sequences encoding 2kb immediately 5' of the transcription start sites (arrow) of the murine *Id2* and *Tcf4* genes were identified from the Ensemble database. Putative transcription factor binding sites (underlined) were predicted by analysis with AliBaba and TF search software programs. The location of primers used for H3 ChIPs (Figures 3C, 3D) are shown in orange (sense) and blue (antisense).

**Figure S6. Regulation of histone H3 modifications at *Tcf4* and *Id2* promoters.**

(A) pDCs and CD11c<sup>+</sup> CD11b<sup>+</sup> DCs were isolated from mice that were unmanipulated (no HGT) or from animals following Flt3L or GM-CSF HGT, as indicated. Histone H3

modifications at the *Id2* and *Tcf4* proximal promoters in the vicinity of the STAT-consensus sites were determined by ChIPs using antibodies against H3K9ac, H3K4me3 and H3K27me3. Results were normalized to ChIPs for total H3 and presented as mean  $\pm$  SEM. n=10-15. (B) pDCs were purified by FACS from BM cells cultured with Flt3L for 7 d, then stimulated with 5  $\mu$ M CpGA for 0, 4, 8 and 16 h. *Id2* mRNA was analyzed by qPCR. (C, D) pDCs and CD11c<sup>+</sup> CD11b<sup>+</sup> DCs were isolated by FACS from HGT-treated hematopoietic-*Stat5* <sup>$\Delta/\Delta$</sup>  mice, hematopoietic-*Stat3* <sup>$\Delta/\Delta$</sup>  animals or appropriate controls, as indicated. Histone H3 modifications at the *Tcf4* and *Id2* proximal promoters in the vicinity of the STAT-consensus sites were determined by ChIPs using antibodies against H3K9ac, H3K4me3 and H3K27me3. Results were normalized to ChIPs for total H3 and presented as mean  $\pm$  SEM. n=10-15. (E) Whole cell lysates were generated from total BM cells isolated from hematopoietic-*Stat5* <sup>$\Delta/\Delta$</sup>  mice, hematopoietic-*Stat3* <sup>$\Delta/\Delta$</sup>  animals or appropriate controls. Expression of H3K4me3 and total H3 was determined by immunoblotting. (F) Hematopoietic-*Stat5* <sup>$\Delta/\Delta$</sup>  mice, hematopoietic-*Stat3* <sup>$\Delta/\Delta$</sup>  animals or appropriate controls were treated with GM-CSF or Flt3L HGT for 7 d, as indicated. The abundance of H3K4me3 at the *Flt3*, *Gata-1*, *Irf8* and *Gapdh* promoters was analyzed in pDCs and cDCs as described in (C and D).

**Figure S7. GM-CSF- and Flt3L-responsive expression of *Id2* and *Tcf4*.**

(A, B) CDPs from hematopoietic-*Stat3* <sup>$\Delta/\Delta$</sup> , hematopoietic-*Stat5* <sup>$\Delta/\Delta$</sup>  mice and respective *Stat* <sup>$+/+$</sup>  controls were purified and cultured in vitro in the presence of Flt3L or GM-CSF, as indicated. *Id2* and *Tcf4* mRNA was determined by qPCR. (C) Hematopoietic-*Stat5* <sup>$\Delta/\Delta$</sup>  and *Stat5* <sup>$+/+$</sup>  mice were treated by HGT with GM-CSF or pORF vector, as indicated. After 2 d, *Tcf4* mRNA was measured in CDPs by qPCR.

**Figure S8. Characterization of D2SC/1 and D2SC/mFlt3 signaling responses to GM-CSF or Flt3L.** (A) Expression of RFP and Flt3 in D2SC/1 or D2SC/mFlt3 cells was analyzed by flow cytometry. (B) *Id2* mRNA abundance was determined in D2SC/1 cells cultured with GM-CSF for 0, 2, 4 and 8 h; *Tcf4* expression was analyzed in D2SC/mFlt3 cells treated with Flt3L for 0, 2, 4 and 8 h. (C, D) STAT1, STAT3 and STAT5 activation was analyzed by immunoblotting to detect tyrosine-phosphorylated isoforms, using whole cell extracts from D2SC/1 and D2SC/mFlt3 cells stimulated with GM-CSF or Flt3L for 0.5, 2, 4 or 8 h, or left untreated, as indicated. IFN- $\gamma$ , IL-6 or GM-CSF-stimulated whole cell extracts were used as positive controls for phosphorylated STAT1, STAT3 and STAT5, respectively. (E) ChIP assays were performed in D2SC/1 cells treated  $\pm$  Flt3L for 1 h, using anti-STAT3 or IgG control antibody. Results are representative of 3 independent experiments.

**Figure S9. Role for *Tcf4* in cytokine-driven DC development.**

BM cells from *Tcf4*<sup>+/-</sup> or *Tcf4*<sup>+/+</sup> mice were cultured with Flt3L for 6 d. pDC and CD11c<sup>+</sup> CD11b<sup>+</sup> cDC generation was assessed within the CD11c<sup>+</sup> population. n=8.

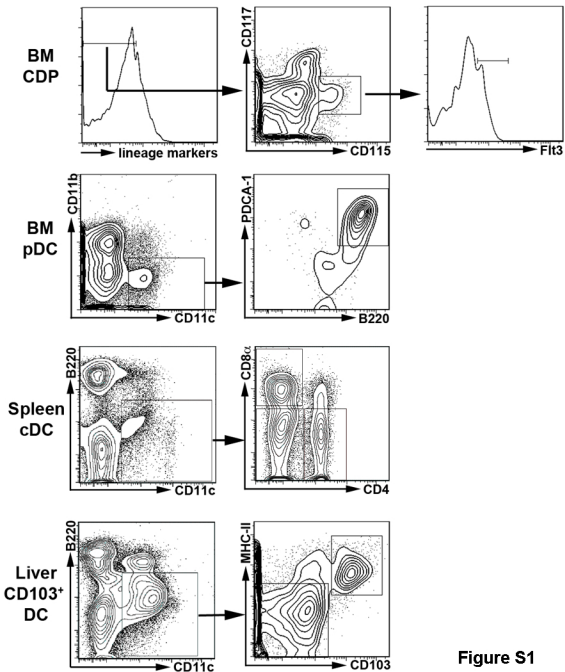

**Figure S1**

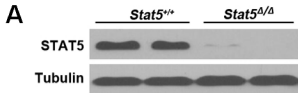

**B** Hematologic parameters and WBC differential counts of hematopoietic *Stat5<sup>Δ/Δ</sup>* mice

|                                     | <i>Stat5<sup>+/+</sup></i> | <i>Stat5<sup>Δ/Δ</sup></i> |
|-------------------------------------|----------------------------|----------------------------|
| <b>Hematologic Parameters</b>       |                            |                            |
| Hemoglobin (g/L)                    | 152.7 ± 6.5                | 147.3 ± 1.7                |
| Hematocrit (%)                      | 53.8 ± 2.4                 | 50.0 ± 2.4                 |
| WBC count (10 <sup>9</sup> /L)      | 3.91 ± 0.73                | 4.66 ± 0.69                |
| RBC count (10 <sup>12</sup> /L)     | 10.9 ± 1.7                 | 9.74 ± 0.94                |
| Platelet count (10 <sup>9</sup> /L) | 1413 ± 202.5               | 1233 ± 64.3                |
| <b>WBC Differential Count</b>       |                            |                            |
| Neutrophil (10 <sup>9</sup> /L)     | 0.92 ± 0.15                | 1.19 ± 0.20                |
| Monocyte (10 <sup>9</sup> /L)       | 0.07 ± 0.005               | 0.08 ± 0.03                |
| Basophil (10 <sup>9</sup> /L)       | 0.02 ± 0.004               | 0.04 ± 0.02                |
| Lymphocyte (10 <sup>9</sup> /L)     | 3.14 ± 0.97                | 3.32 ± 0.61                |
| Eosinophil (10 <sup>9</sup> /L)     | 0.07 ± 0.02                | 0.09 ± 0.04                |

Results represent Mean ± SD of peripheral blood analysis of 4 hematopoietic *Stat5<sup>Δ/Δ</sup>* mice and their littermate control (*Stat5<sup>+/+</sup>*).

WBC = white blood cell, RBC = red blood cell.

**Figure S2**

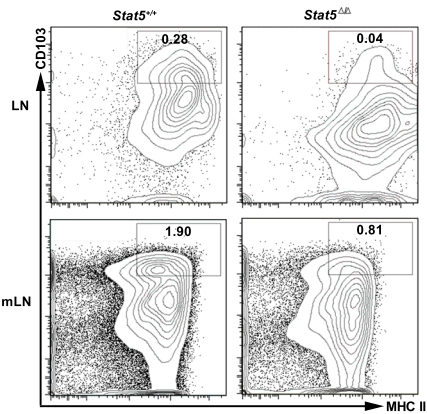

Figure S3

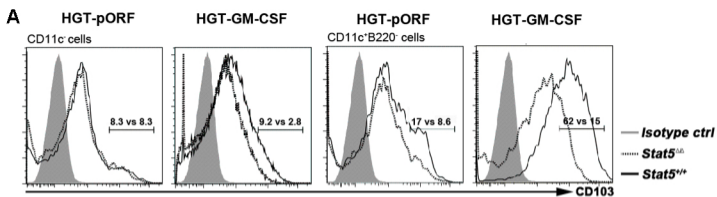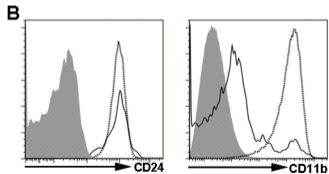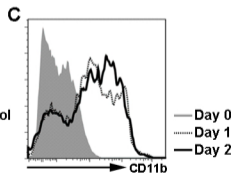

**Figure S4**



**A** *Id2* promoter (mouse chr. 12; 25,782,957 - 25,780,957)

TACTGGTAACTCGGCTCTTCACTCAATTAACAGTTCACAATCCCTTAAAATGATCTTTAAATGAATGCAAAAACCTGGGTAGT  
 AATGAAATGCAAAAACCTGGGTAGTGTGCCAACAGAACTCGGATTCAGCCGAGCTCGGAGAGCTGGACTTGGCATGGCAGCCAGAGAAAGAAACCGCCAGAA  
 ACTTTTACCATAITTAGCAATTTTACTATATACAGGATACAGGAATGGCTTTGGGAGAAAGCCGCTCATGCTGGTFCGCTGCCAGTGTGTGGAGCAGTCCGCT  
 GATA-1  
 ACAGCCGCATTATCATCCAGCCAGGCGCTTCTGTGGGATTAAGAGCTGGCAGCCGCTGGCCACAGCTGGAGAAATTAATCTTTAAATGGAGAACTGAGATCCGCT  
 GATA-1/GATA-2  
 AGTACCCGAGAGATCCAAATGTCACAAAGAACTTAATGTAGAAATCCAGAGATGTTGGTTACATTTGGCTATTATTGTAAAATCACTCAGAGTATA  
 ACATCATGAACAAAAAGTGTCAAAAACAAAATCTGTTCCGCTGTGGCAGTATGTGACAGAAACACATGACACAAAAGTACATCAAGAGGCTCGAACTGTTG  
 GGGGGGGGGGGGACTCAGATAGTAAATCACTTCCAGGCTTAATAACAGAGCGAGTGTGCAATCGAACACTGTGCTGAGTGCAGGAGGGCAATGCAAGCC  
 GATA-1  
 TTGCTTTCGCGAATTTTCCGCGAGGCGCAGAGTCTTCCAGCTCCAAACTGGAGTGGACGGATTTTACGCGCTCTACATCACCGGACTCTGCCCTCT  
 AGAGAGAGCCCTGGGCGACATGCTGTCTACGCTGGAGGTCAGAGACCGCTGGCCACAGCTGGAGAAATTAATCTTTAAATGGAGAACTGAGATCCGCT  
 TCCACACAGAGCTTTGCCCTGGATTCGCACTCTTCTCTTTTATTGCACTCAGAGGATGTGGGGGATTCAGACCAAAAACCCCTTCTTGGGCTTAACATAAA  
 GATA-1/GATA-2  
 TATTTTITTTCTTTAAATACACAGCAATAATATAGGTAGTCTTCAGCAAAAACAGAAATTCAGAAATTAAGGCAATGGAGTCAAGAGCTCTAACTTTTCAA  
 ICSBP  
 ATGTGGCTGCATCAGGAAAGGGTGTGAAAGATTCCAAAACCTGTACATGTAACAGAAATTTTCTTTTA AAAACAGCGATAAGCTGTCCAGTCAATAGCTAGGAC  
 CACCTACTGACAAAAGAGCTTCCCAAAGAGCTCTAAAGTGTGGAAATGTGACACAGAAATCCAGGATTTGTGCATAATTAATCGCATCACTTTGCCACTACA  
 GATA-1  
 CTGAAAGGCGACAGCAAGGCGAGTGTATGTAATGTAGTTCAGTGTGCAAAACCCCACTAATGACCTTCGATTAATGGAGTCAATATAGTAACCCCTGGCT  
 CATCTTGTGGGGGTGGGGGAGTTCGGAATGACCCGGGCTCCCTCGGGCTCTCTCGGCTCGAGGAGACCCAGCTGATGTATGTGGTAGGTTCCCCCTCCCAAAATAG  
 GTTTCGAGAGAGGCTCCCGCGCTCCCAAGTGTCCAAAGTTCGAAAGCTTCACGCTAAAACCTGTGCTGGAGCTGTATGTGGTAGGTTCCCCCTCCCAAAATAG  
 STATA  
 CTTTCTTTATCTTAAAGAGGAGCACTCAAATGTGACTTCCGAAAAGCGCGCTTCTGCTGGAGCTGTATGTGGTAGGTTCCCCCTCCCAAAATAG  
 GATA-1/GATA-2  
 CTTGTGACTTCCCGTCTGTGCGGAGAGAGTGGGGCTGCTGCAAGTCTCGGGGCGGGGTAGAGCTAGCTCCGGGCGACACCCCGGGGAGGGGGCTTCG  
 ICSBP  
 CAGCTCTGGGAATGGGAATAAGCGGGGACAATTTGCACTACTAGGCCCTGGGCGCCAGCGCACACTGTACTCAATTTGCCACCCAGCTGGGCTCTCG  
 CCGCTCTCCACCCCTACAGGCAATGGCTGCGAACCGCGAAGAACCGAGAGCTCATACTCACCAATGGGAGAAATCGGCTGTATGATGGACGGGAGCC  
 TTCCACCAATGGCAATTCAGGGATGCCGATTGAGCGGCCAGGGCGAGTGCACATAAAGAGCGCCCGCCGGCTCGCGCTTCATCTGAA

**B** *Tcf4* promoter (mouse chr. 18; 69,502,146 - 69,504,146)

CACTCAGGAGGCTGAGGCAAGTGGATTTCTGTGTTTCAAAG  
 CCAAGCCAGGCTACTAGGCAAGTTCAGGACAGCTGGGGCTCAACAGTAAATCTGTCTCTGAACTGCCCTCTACTCCGAAAGGATAGCTGGAAAGCGGCG  
 CATCTCCAAGCCAGAAAAGGAGAGTCTTAGCAGAACTGACCATGTTTGCACCCATAATCTCAGACTTAGACTCTGGAACTGTGAAAAGTGAATGCCCT  
 TTGTGCAAGCCACCTGTGCTCTCCCTGTGTTACAGTGGCCAGAGTGGACTAAGACACACATCTGTATCAGATACATAGTCTGGGGGAAATGTGTAGA  
 ICSBP ICSBP  
 CCAAGGAGCCACCAAGACTCACCCATTACACTAATCTTTTATCTTTAAGCITTACAGTGTCCCTCAAAACACCCCTTTCTAAAGTGTCTCCAAATTTCCA  
 ICSBP  
 AAGTATAAATGAAAGTACTTATCCCTCTCAGCTTCAGGAAAAAACAAGGACGAAACACCCACATGTGTCCCTTAATTTAAACAGGAGAGGGACTCAC  
 ACATTTCCCTTTCTTCTGATCAAAAAGGGGCCAGGAGAAAAACAAGGGGCACTAGACTAGCAGGAGGTTGTTTGCATCCCAAATCTGATCTAATCAGCGATT  
 ICSBP GATA-1 PU.1  
 CTGGACAGATATTTGCTGCCCTGAAATCAGGAGGGGGAATCTTACAAACCTAAAAGCTAAAAGGGATTTTATGGGATTATCTAATCTAGCCCTGTGAT  
 HyoB  
 TTTATGGCAAGGTCACCTGGCATGGAGTCTGAGGTCACAGTGTGATTTGGAGGATAGAGCCAAATGGAAATTTTTTCTACGCCAATGCTTGTGATCTTTT  
 ATTACAGTGATTTTTTCCCCCCAGAGCTGTGCGAGGGCTTACTCTGAGAACAGGAGATAATGTCTGTGATAATGCATATAAAGAGGTGGCTAAATGTAA  
 GATA-1  
 AATATTATTTAGGATGAAATGTGGAAATGGGGGAAAAACACTGGAGTCCCTCATGATGTGTGAAATAGCCCAAAATGTCCTCAATTTGCTGTAA  
 ICSBP  
 ACTCTGAGTAAACATCTCAAACTGTCTAGTGGGCCACGATTTAAATCAGAGATAGAGATAGAGAGCTTCTCACTGCCAGTGGCTTTGGACATGATG  
 GATA-2 GATA-1  
 GAGGTGCACTCTGTGTCACATGTCTTCAAAGTGGGCTCTGTGCTACTACTATAGAGAGTAGTTTTAGTGGCAAAATCTGTGCTTTTAAAGCAACTGTG  
 GGTGTGGGTCAGAGTCTGTGATATTCACTTCTCTGTGGTGTAGGTCAGTCAAGTAAAGGATGTGAATGTACTCTACCTTCAAAGGCCACATCAATATG  
 GCCTACATTTGTGAAATCTTAGAACACTGTCTGGATCAGAAATAGGCTTCTGTGTGGGGAGCCGGACACTATTTTTTGGATACGTGAGTTATCTACAAT  
 GATA-1  
 GCAATGTCTAAGTTAGGGGTATCAGTGAAGTCAAGAAATAGGGATGGAAGCGGTATATTCTATAGTAGTAGCTCACCTGTATGGCTATCATATAG  
 E47  
 GTATCTCAAAGTCCCAATGCTATTTGTGTGAGGAGAAAAACAGGTTTGAAGAGTAAATGTTGGCCCAAATGGAAATGCTCTGTGTTTGGTCTAAGAGC  
 GATA-1/GATA-2  
 CATACGGTCTTACATCAATAAAGGTAGACTTTGCACTAACCAAGTCTCACACTCCCGGAGCTTATAAAGAAAGGGGTGGGACCGAGAGGGAGAGGGGA  
 GGGACCCCTCTACTTCTCAGGCTCAGGGTCAAGCTTGTGCTTGTGGCTTTCCCAACCCCGCCAAAGCGGCTGAAAATCTGCAATCCCACTGACAGGG  
 ACACTGTGCAATTAAGGCCCTCACGGACTCTCCGGGCTCCCGGGGAGGCTTTCACGCTGCAGGAAACCGCTTTTAGTCAAGAGATCAAGGCCCGCA  
 GATA-2  
 GGGAACGGGGCGCAAGCGGCTCCGAGAGCCAGGACTGAGTGAAGTCCCAACCGCCGGCGGAGCCGCTGTGTTCCCGGAGAGGCTGGCTGCTAGAGCGC  
 STATA  
 GCCCACTTTGGCGGCTCTTAGCGCTCTGTTTACCCTCTATGCTGCGGTGCTCCCGCCCGCCCTCCCAAGTCAATGCTGTGGAGCAGCCCGGCG  
 GATA-2  
 CGCAGCGCTTCTCTTTAAGCCCGCAGTGCAGGCTGTGAAT

Figure S5

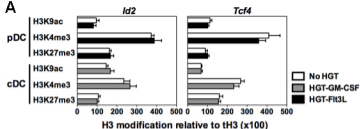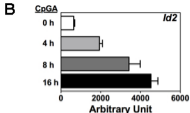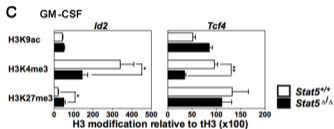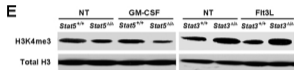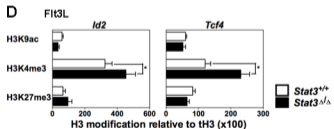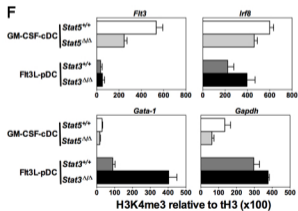

Figure S6

**A in vitro**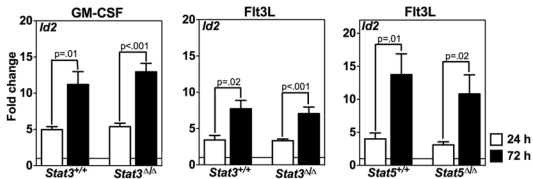**B in vitro**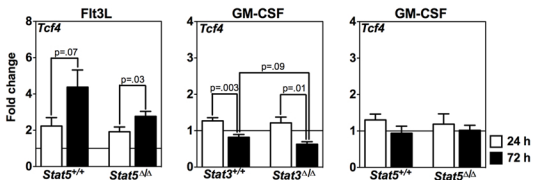**C in vivo**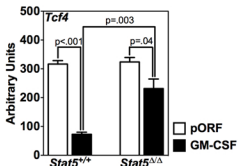**Figure S7**

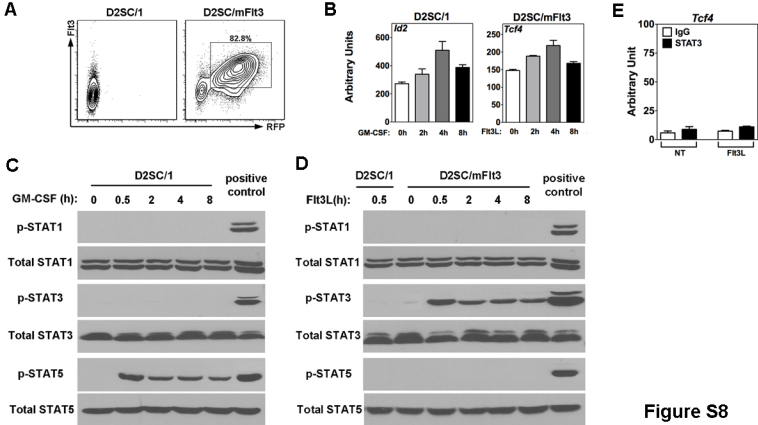

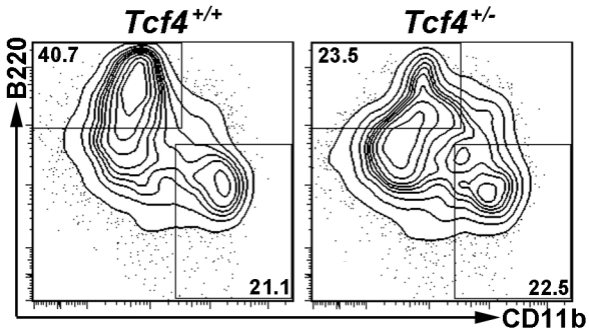

**Figure S9**

**Table S1. Oligonucleotides used in this study.**

|                                                            |                           |
|------------------------------------------------------------|---------------------------|
| <b>Real-time PCR primers</b>                               |                           |
| <i>Tcf4</i> sense                                          | AGACCAAGCTCCTGATTCTC      |
| <i>Tcf4</i> antisense                                      | AGGCTCTGAGGACACCTTCT      |
| <i>Id2</i> sense                                           | AAAACAGCCTGTCGGACCAC      |
| <i>Id2</i> antisense                                       | CTGGGCACCAGTTCCTTGAG      |
| <b><i>Tcf4</i> and <i>Id2</i> promoter cloning primers</b> |                           |
| <i>Tcf4</i> sense (XhoI)                                   | ATCTCGAGTGAAGGTGGACTCTG   |
| <i>Tcf4</i> antisense (HindIII)                            | ACAAGCTTGGCACTGCGGCTTAT   |
| <i>Id2</i> sense (XhoI)                                    | ATCTCGAGTGGCTGCATCTAGGAAG |
| <i>Id2</i> antisense (HindIII)                             | GCAAGCTTGCTTTCATGCTGCTCGT |
| <b>EMSA oligonucleotides</b>                               |                           |
| <i>Tcf4</i> sense                                          | CCCTGGTTCCCGGAGGAGGCG     |
| <i>Tcf4</i> antisense                                      | CGCCTCCTCCGGGAACCAGGG     |
| <i>Id2</i> sense (distal)                                  | CTGAGTTTCCGAGAAGGCCTC     |
| <i>Id2</i> antisense (distal)                              | GAGGCCTTCTCGGAAACTCAG     |
| <i>Id2</i> sense (proximal)                                | TGTGACTTCCCAAAGCGCGC      |
| <i>Id2</i> antisense (proximal)                            | GCGCGCTTTTGGGAAGTCACA     |
| <b>ChIP primers <sup>1</sup></b>                           |                           |
| <i>Tcf4</i> sense                                          | CTCTTCCAGCTCAGGGTCAC      |
| <i>Tcf4</i> antisense                                      | CTGCTCCACCAGACAATGAC      |
| <i>Id2</i> sense                                           | TGTGCAAACCCCACTAATGA      |
| <i>Id2</i> antisense                                       | CGCTTTTGGGAAGTCACATT      |

<sup>1</sup> Primer sequences for the ChIP assays performed in Figures 3C and 3D are indicated in Figure S5.
